# Supplementary material for: Optimization of DNA Extraction from Field-Collected Mammalian Whole Blood on Filter Paper for Trypanosoma cruzi (Chagas Disease) Detection
Source: MDPI journal article supplement (doi:10.3390/pathogens10081040), 2021-08-17
Supplement: s1 [file s1]

Supplementary Table 1. Quantitative PCR results for *Trypanosoma cruzi* assays performed on spiked canine whole blood specimens. DNA extraction optimization methods detailed in text. Ct = cycle threshold; WB Direct = whole blood samples processed directly; WB Nobuto = whole blood samples processed from Nobuto blood filter papers; MED = medium spiking load; HI = high spiking load.

| DNA Extraction Method                            | WB Direct      |                    |                |                    | WB Nobuto      |                    |                |                    |
|--------------------------------------------------|----------------|--------------------|----------------|--------------------|----------------|--------------------|----------------|--------------------|
|                                                  | MED            |                    | HI             |                    | MED            |                    | HI             |                    |
|                                                  | Mean Ct Values | Standard Deviation |
| Qiagen Extraction Optimization Method A          | 30.4           | 0.28               | 25.0           | 0.23               | 30.7           | 0.49               | 25.6           | 0.11               |
| Qiagen Extraction Optimization Method B          | 29.3           | 0.62               | 24.4           | 0.17               | 31.1           | 0.84               | 26.1           | 0.18               |
| Zymo Research Quick-DNA/RNA Pathogen Miniprep    | 33.1           | 0.12               | 25.0           | 0.16               | 34.1           | 2.64               | 30.3           | 0.30               |
| Zymo Research ZR-Duet™ DNA/RNA MiniPrep Plus kit | 31.8           | 0.30               | 25.4           | 0.21               | 35.7           | 2.70               | 27.7           | 0.13               |

Supplementary Table 2. Collection information pertaining to skunk whole blood samples used in DNA extraction optimization testing.

| Angelo State Natural History Collections specimen number | Species                   | Collection location          | Collection date   |
|----------------------------------------------------------|---------------------------|------------------------------|-------------------|
| ASK 11844                                                | <i>Spilogale gracilis</i> | Tom Green County, Texas, USA | January 7, 2017   |
| ASK 11857                                                | <i>Mephitis mephitis</i>  | Tom Green County, Texas, USA | February 18, 2014 |

|           |                             |                                 |                 |
|-----------|-----------------------------|---------------------------------|-----------------|
| ASK 11860 | <i>Conepatus leuconotus</i> | Tom Green County,<br>Texas, USA | August 27, 2016 |
|-----------|-----------------------------|---------------------------------|-----------------|

Supplementary Table 3. Quantitative PCR results for  $\beta$ -actin assays performed on skunk whole blood samples archived on Nobuto blood filter strips and processed using three optimized Qiagen DNeasy Blood & Tissue Kit DNA extraction methods as detailed in text. Ct=cycle threshold.

| Samples                                 | Mean Ct Values                   |                                  |                                  | A/B Fold Difference | A/C fold Difference |
|-----------------------------------------|----------------------------------|----------------------------------|----------------------------------|---------------------|---------------------|
|                                         | Extraction optimization method A | Extraction optimization method B | Extraction optimization method C |                     |                     |
| <i>Conepatus leuconotus</i> , ASK 11860 | 26.5                             | 27.0                             | 26.8                             | 1.4                 | 1.2                 |
| <i>Spilogale gracilis</i> , ASK 11844   | 24.3                             | 24.9                             | 25.2                             | 1.6                 | 1.9                 |
| <i>Mephitis mephitis</i> , ASK 11857    | 23.0                             | 23.6                             | 23.9                             | 1.5                 | 1.8                 |
